# Supplementary material for: Beryllium decorated armchair BC2N nanoribbons: coexistence of planar tetracoordinate carbon and nitrogen moieties
Source: Royal Society of Chemistry journal article supplement (doi:10.1039/c5ra12660f), 2015-01-01
Supplement: c5ra12660f1.pdf [file c5ra12660f1.pdf]

**Supporting Information:**

**Beryllium Decorated Armchair BC<sub>2</sub>N Nanoribbon: Coexistence of  
Planar Tetracoordinate Carbon and Nitrogen Moieties**

Bo Xiao, Jian-bo Cheng, Zhen-bo Liu, Qing-zhong Li, Wen-zuo Li, Xin Yang, Xue-  
fang Yu\*

*The Laboratory of Theoretical and Computational Chemistry, School of Chemistry  
and Chemical Engineering, Yantai University, Yantai 264005, China*

**Figure S1.** Stable configurations of atoms-decorated armchair BC<sub>2</sub>N nanoribbon.

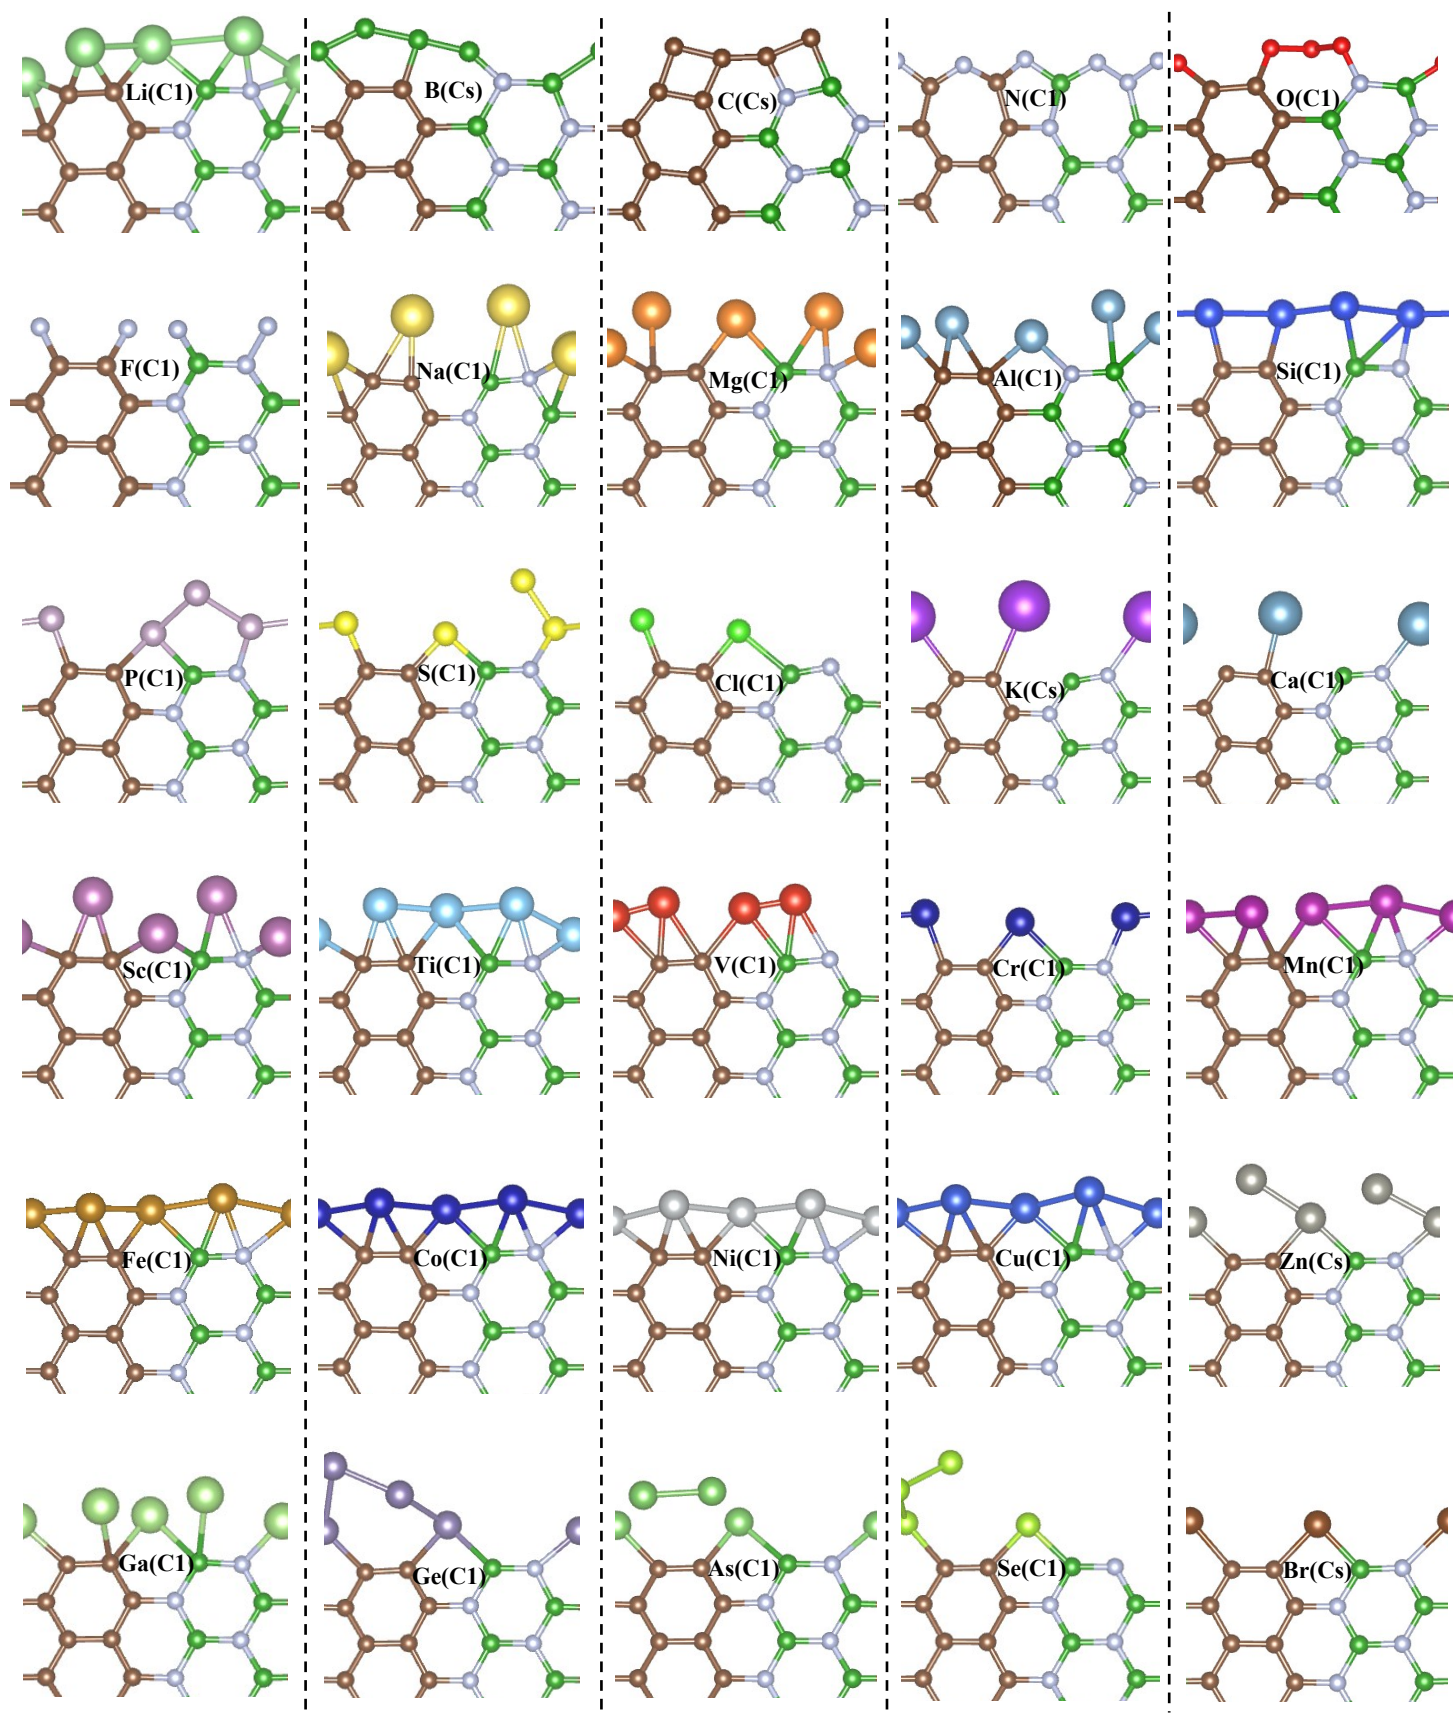

**Figure S2.** The finite molecular models for Be decorated aBC<sub>2</sub>NNR

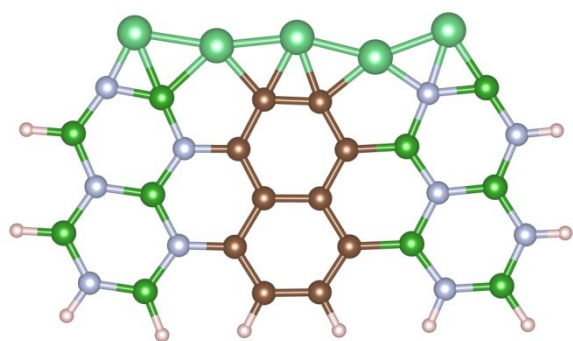

(a)

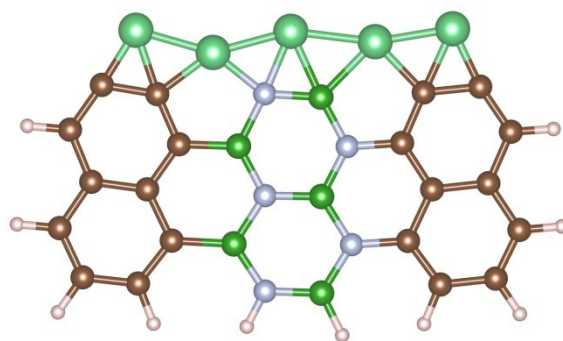

(b)

**Figure S3.** The most stable structure of Be- $\langle aBC_2NNR \rangle$ -( $c$ )Be models.

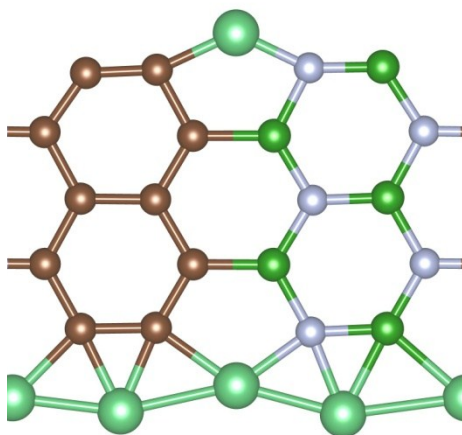

Be- $\langle aBC_2NNR \rangle$ -(1/4)Be

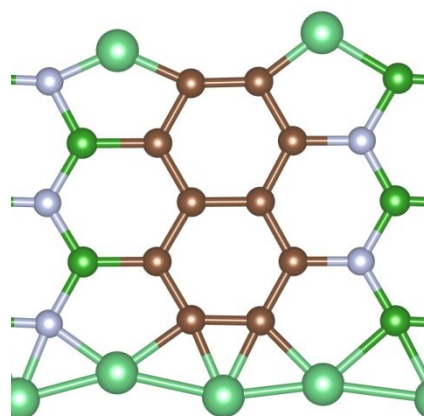

Be- $\langle aBC_2NNR \rangle$ -(2/4)Be

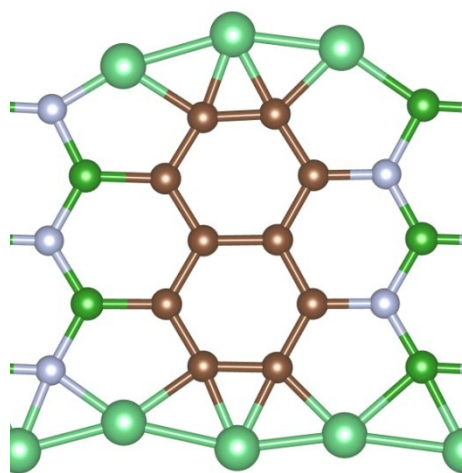

Be- $\langle aBC_2NNR \rangle$ -(3/4)Be

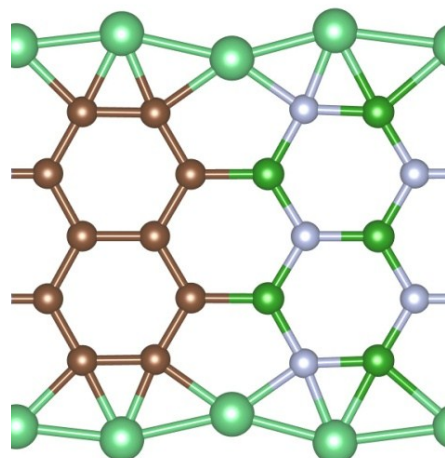

Be- $\langle aBC_2NNR \rangle$ -Be
